# Supplementary material for: Changes in Vitellogenin (Vg) and Stress Protein (HSP 70) in Honey Bee (Apis mellifera anatoliaca) Groups under Different Diets Linked with Physico-Chemical, Antioxidant and Fatty and Amino Acid Profiles
Source: MDPI journal article supplement (doi:10.3390/insects13110985), 2022-10-26
Supplement: s1 [file s1]

**Supplementary Table S1.** Group Consumption During the Experimental Period

| Groups                      | Sugar Syrup (lt) | Bee cake (gr) |
|-----------------------------|------------------|---------------|
| Sugar Syrup                 | 14.0             | -             |
| Commercial Bee Cake         | 14.0             | 1350          |
| <i>P. somniferum</i> pollen | 14.0             | 1350          |
| <i>C. creticus</i> pollen   | 14.0             | 1350          |
| Mixed pollen                | 14.0             | 1350          |

**Supplementary Table S2.** Colony Numbers of the Groups at the Measurement Dates

| Measurement | Colony Numbers of the Groups |             |                     |                             |                           |              |
|-------------|------------------------------|-------------|---------------------|-----------------------------|---------------------------|--------------|
|             | Control                      | Sugar Syrup | Commercial Bee Cake | <i>P. somniferum</i> pollen | <i>C. creticus</i> pollen | Mixed pollen |
| 14.09.2020  | 8                            | 8           | 8                   | 8                           | 8                         | 8            |
| 18.11.2020  | 7                            | 6           | 8                   | 8                           | 8                         | 8            |
| 10.03.2021  | 4                            | 6           | 7                   | 8                           | 7                         | 7            |

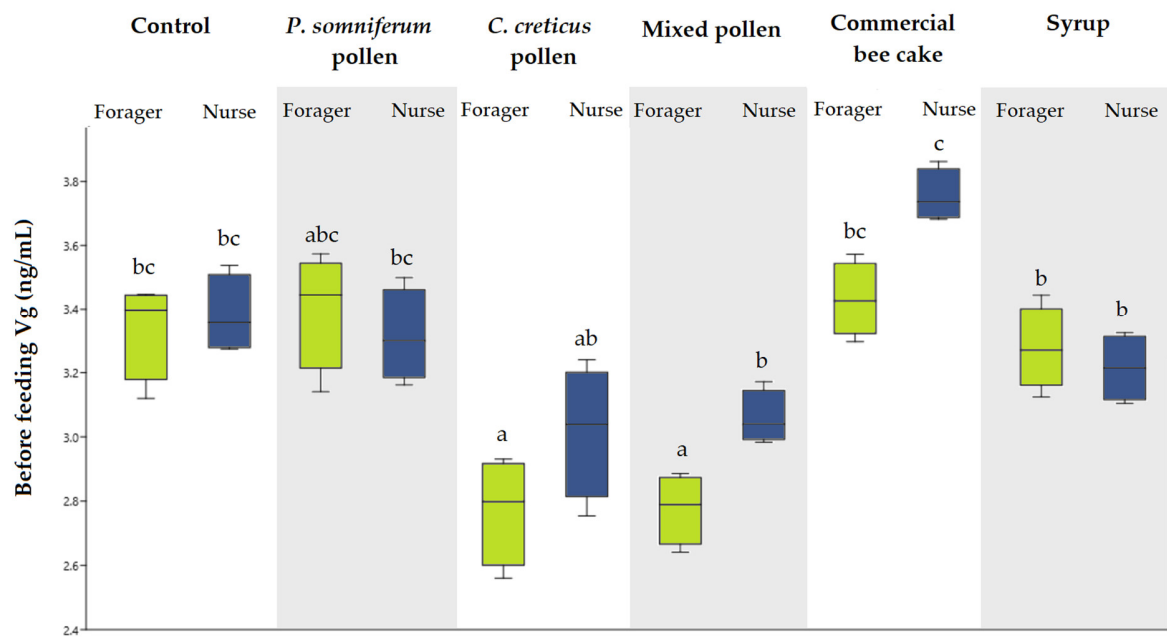**Supplementary Figure S1.** Vg content/values of Groups before feeding. Different letters denote significant differences (p<0.05)

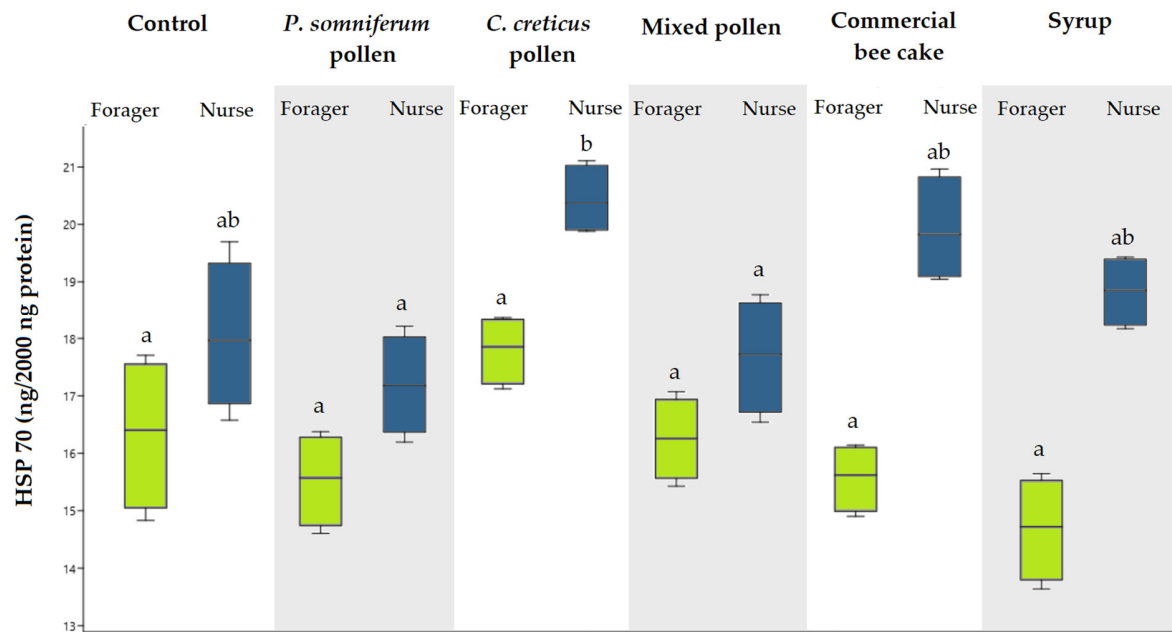

**Supplementary Figure S2.** HSP 70 content/values of Groups before feeding. Different letters denote significant differences ( $p < 0.05$ )
